# Supplementary material for: Continuous Glucose Monitoring Trajectories in Patients with Acute Coronary Syndrome
Source: Research Square preprint supplement (doi:10.21203/rs.3.rs-8604461/v1), 2026-01-25

**SUPPLEMENTARY APPENDIX:**

***Continuous Glucose Monitoring Trajectories in Patients with Acute Coronary Syndrome****Diaz-Exposito A et al.*

**Inclusion and Exclusion Criteria:**

High-risk ACS patients are included in the study if at least two of the following inclusión criteria are present: age > 65 years, diabetes mellitus, multivessel coronary artery disease, peripheral artery disease, chronic kidney disease, prior stroke (anytime) or prior transient ischaemic attack in the last 6 months, prior myocardial infarction, complex percutaneous coronary intervention, prior PCI or coronary artery bypass grafting, heart failure, body mass index > 27 kg/m², anticipated long-term use of an oral anticoagulant, haemoglobin < 11 g/dL, spontaneous bleeding requiring hospitalisation or transfusion in the past 12 months, bleeding diathesis, active malignancy, or previous spontaneous intracranial haemorrhage.

Exclusion criteria were limited in order to allow for a contemporary all-comer population, and comprised: age < 18 years, low life expectancy (< 1 year) in the judgement of the treating physician, pregnant or breastfeeding women, evidence at coronary angiography of non-significant coronary artery disease (< 30% stenosis in the left main stem or < 50% in other coronary segments).

**Supplementary Table 1. Baseline characteristics of the study population**

| Characteristic | Total (n = 274) |
| --- | --- |
| Demographics |  |
| Age, years | 66.34 ± 11.59 |
| Male sex, n (%) | 214 (78.1%) |
|  |  |
| Cardiovascular risk factors |  |
| Hypertension, n (%) | 179 (69.9%) |
| Diabetes mellitus, n (%) | 113 (44.3%) |
| Type 1 diabetes, n (%) | 2 (0.8 %) |
| Type 2 diabetes, n (%) | 111 (43.5 %) |
| Hypercholesterolaemia, n (%) | 183 (71.5%) |
| Current smoker, n (%) | 68 (25.2%) |
| Former smoker, n (%) | 124 (45.9%) |
| BMI | 28.41 ± 4.04 kg/m² |
| Normal weight | 45 (16.42%) |
| Overweight | 111 (40.51%) |
| Obesity | 55 (20.07%) |
|  |  |
| Comorbidities |  |
| Atrial fibrillation, n (%) | 12 (4.7%) |
| Previous MI | 65 (25.5%) |
| Ischaemic stroke / transient ischaemic attack, n (%) | 14 (5.5%) |
| Peripheral artery disease, n (%) | 20 (7.8%) |
| Heart failure, n (%) | 22 (6.6 %) |
| Chronic obstructive pulmonary disease, n (%) | 21 (8.2 %) |
| Obstructive sleep apnoea, n (%) | 32 (12.5%) |
| Chronic kidney disease>3stage, n (%) | 48 (26.1%) |
| Liver disease, n (%) | 2 (0.8%) |
| Family history, n (%) | 173 (63.1%) |
|  |  |
| Chronic medical therapy |  |
| Statins, n (%) | 255 (93.1%) |
| Ezetimibe, n (%) | 155 (56.6%) |
| PCSK9 inhibitor, n (%) | 5 (1.8%) |
| Fibrates, n (%) | 1 (0.4%) |
| ACE inhibitor, n (%) | 111 (42.7%) |
| Angiotensin II receptor blocker, n (%) | 109 (41.9%) |
| Beta-blocker, n (%) | 207 (79.6%) |
| Mineralocorticoid receptor antagonist, n (%) | 57 (21.9 %) |
| SGLT2 inhibitor, n (%) | 124 (47.7%) |
| GLP-1 receptor agonist, n (%) | 29 (11.2%) |
| Insulin, n (%) | 27 (10.4%) |
| Other antidiabetic agents, n (%) | 99 (38.2%) |
| Diuretics, n (%) | 83 (31.9%) |
| Systemic corticosteroids, n (%) | 3 (1.2%) |
| Aspirin (ASA), n (%) | 255 (98.1%) |
| Clopidogrel, n (%) | 60 (23.2%) |
| Ticagrelor, n (%) | 136 (52.5%) |
| Prasugrel, n (%) | 63 (24.04%) |
| Non–vitamin K oral anticoagulant (NOAC), n (%) | 27 (10.9%) |
| VKA | 2 (0.8%) |
| ACE, Angiotensin-Converting Enzyme; ASA, Acetylsalicylic Acid; BMI, Body Mass Index; GLP-1, Glucagon-Like Peptide-1; MI, Myocardial Infarction; NOAC, Non–Vitamin K Oral Anticoagulant; PCSK9, Proprotein Convertase Subtilisin/Kexin Type 9; SGLT2, Sodium–Glucose Cotransporter 2; VKA, Vitamin K Antagonist. | |

**Supplementary Table 2: CGM metrics change between baseline and 4-months follow-up according to diabetes status.**

| Metric | Without Diabetes Baseline | Without Diabetes 4 months | Mean difference | 95% CI | p-value | Diabetes Baseline | Diabetes 4 months | Mean difference | 95% CI | p-value |
| --- | --- | --- | --- | --- | --- | --- | --- | --- | --- | --- |
| TIR 70-180 (%) | 96.82 ± 5.24 | 95.97 ± 8.48 | -0.86 | [-3.23, 1.51] | 0.4724 | 74.50 ± 24.93 | 72.12 ± 26.35 | -2.38 | [-8.06, 3.31] | 0.3861 |
| TTR 70-140 (%) | 88.73 ± 8.82 | 85.70 ± 11.30 | -3.03 | [-5.92, -0.14] | 0.0333 | 52.58 ± 29.81 | 47.69 ± 27.93 | -4.89 | [-10.39, 0.61] | 0.0799 |
| TAR >180 (%) | 1.20 ± 2.62 | 1.47 ± 2.44 | 0.27 | [-0.21, 0.76] | 0.1894 | 23.92 ± 25.53 | 26.16 ± 26.33 | 2.24 | [-3.11, 7.58] | 0.2081 |
| TBR <70 (%) | 1.98 ± 4.75 | 2.56 ± 7.96 | 0.58 | [-1.71, 2.88] | 0.6958 | 1.58 ± 2.59 | 1.73 ± 6.97 | 0.14 | [-2.09, 2.37] | 0.0209 |
| TBR level 2 (<54, %) | 0.32 ± 0.85 | 0.58 ± 2.59 | 0.26 | [-0.44, 0.96] | 0.8931 | 0.14 ± 0.32 | 0.20 ± 0.94 | 0.05 | [-0.24, 0.35] | 0.1137 |
| TAR level 2 (>=250, %) | 0.03 ± 0.13 | 0.03 ± 0.12 | -0.00 | [-0.02, 0.02] | 0.9165 | 6.30 ± 10.21 | 7.52 ± 14.21 | 1.22 | [-2.43, 4.88] | 0.6154 |
| Mean glucose (mg/dL) | 109.30 ± 9.93 | 111.58 ± 11.05 | 2.28 | [-0.32, 4.87] | 0.0843 | 148.71 ± 38.07 | 154.64 ± 42.03 | 5.93 | [-2.92, 14.78] | 0.1840 |
| SD (mg/dL) | 20.26 ± 6.32 | 21.45 ± 6.42 | 1.18 | [0.04, 2.33] | 0.0429 | 38.19 ± 14.74 | 39.31 ± 15.11 | 1.13 | [-2.28, 4.54] | 0.5096 |
| CV (%) | 18.43 ± 4.90 | 19.19 ± 5.16 | 0.76 | [-0.33, 1.85] | 0.1701 | 25.51 ± 6.90 | 25.18 ± 6.38 | -0.34 | [-2.44, 1.77] | 0.9207 |
| Intraday CV (%) | 16.70 ± 4.44 | 17.55 ± 4.34 | 0.85 | [0.05, 1.64] | 0.0146 | 20.63 ± 4.29 | 21.66 ± 4.76 | 1.03 | [-0.17, 2.23] | 0.0909 |
| GMI (%) | 5.92 ± 0.24 | 5.98 ± 0.26 | 0.05 | [-0.01, 0.12] | 0.0843 | 6.87 ± 0.91 | 7.01 ± 1.01 | 0.14 | [-0.07, 0.35] | 0.1840 |
| MAGE (mg/dL) | 40.54 ± 12.95 | 43.38 ± 13.25 | 2.84 | [0.92, 4.76] | 0.0043 | 70.31 ± 23.71 | 74.32 ± 27.19 | 4.01 | [-1.83, 9.85] | 0.1735 |
| LBGI | 1.02 ± 1.02 | 1.05 ± 1.46 | 0.03 | [-0.36, 0.42] | 0.6162 | 0.58 ± 0.74 | 0.55 ± 1.19 | -0.03 | [-0.42, 0.36] | 0.2082 |
| HBGI | 0.55 ± 0.57 | 0.67 ± 0.57 | 0.13 | [0.01, 0.24] | 0.0328 | 5.43 ± 5.54 | 6.23 ± 6.74 | 0.80 | [-0.69, 2.30] | 0.2491 |
| CONGA-24 (mg/dL) | 18.84 ± 6.22 | 19.96 ± 5.80 | 1.12 | [0.12, 2.13] | 0.0293 | 32.52 ± 11.42 | 34.95 ± 12.96 | 2.44 | [-0.38, 5.25] | 0.0879 |
| Hypoglycaemia events (n) | 5.27 ± 9.04 | 5.18 ± 6.52 | -0.10 | [-2.65, 2.45] | 0.4327 | 4.87 ± 7.90 | 2.53 ± 4.67 | -2.34 | [-4.68, 0.00] | 0.0194 |
| Hyperglycaemia events (n) | 3.65 ± 5.76 | 5.37 ± 7.39 | 1.73 | [0.18, 3.28] | 0.0124 | 21.21 ± 13.36 | 25.17 ± 16.35 | 3.96 | [-0.11, 8.02] | 0.0561 |

CONGA-24, Continuous Overall Net Glycemic Action over 24 hours; CV, Coefficient of Variation; GMI, Glucose Management Indicator; HBGI, High Blood Glucose Index; LBGI, Low Blood Glucose Index; MAGE, Mean Amplitude of Glycaemic Excursions; SD, Standard Deviation; TAR, Time Above Range; TBR, Time Below Range; TIR, Time in Range; TTR, Time in Tight Range.

# **Supplementary Table 3**. Baseline CGM-derived metrics at baseline early after an acute coronary syndrome among patients with and without a worsening CGM-trajectory. Worseners were defined as a ΔTTR ≤ −5%. CI:

| **Metric** | **Non-Worseners (N=67)  (Mean ± SD)** | **Worseners (N=42)**  **(Mean ± SD)** | **p-value** |
| --- | --- | --- | --- |
| Time in range 70–180, % | 86.56 ± 21.95 | 88.21 ± 17.37 | 0.6184 |
| Time in range 70–140, % | 73.48 ± 29.17 | 72.60 ± 24.86 | 0.4382 |
| Time above range >180, % | 11.42 ± 22.16 | 10.32 ± 17.41 | 0.1801 |
| Time below range <70, % | 2.02 ± 4.70 | 1.47 ± 2.49 | 0.6099 |
| Time <54, % | 0.25 ± 0.55 | 0.24 ± 0.86 | 0.4679 |
| Time ≥250, % | 2.99 ± 8.31 | 2.32 ± 5.81 | 0.7348 |
| Mean glucose, mg/dL | 126.08 ± 35.33 | 126.63 ± 28.53 | 0.3617 |
| Standard Deviation | 27.15 ± 13.77 | 29.34 ± 14.52 | 0.3057 |
| Coefficient of variation, % | 20.93 ± 6.67 | 22.36 ± 7.12 | 0.2430 |
| Intraday CV | 18.29 ± 5.20 | 18.55 ± 4.17 | 0.4273 |
| Glucose management indicator, % | 6.33 ± 0.85 | 6.34 ± 0.68 | 0.3617 |
| MAGE, mg/dL | 52.21 ± 24.70 | 55.23 ± 22.10 | 0.2430 |
| LBGI | 0.88 ± 1.05 | 0.74 ± 0.74 | 0.7603 |
| HBGI | 2.73 ± 4.82 | 2.53 ± 3.70 | 0.2856 |
| CONGA-24, mg/dL | 24.50 ± 11.55 | 25.11 ± 10.71 | 0.4201 |
| Hypoglycaemic events, n | 5.84 ± 9.70 | 3.93 ± 6.44 | 0.4406 |
| Hyperglycaemic events, n | 10.91 ± 13.99 | 11.71 ± 11.85 | 0.1917 |

DM, diabetes mellitus. MAGE, mean amplitude of glycaemic excursions; LBGI, low blood glucose index; HBGI, high blood glucose index; CONGA-24, continuous overall net glycaemic action over 24 h; LVEF, left ventricular ejection fraction; MI, myocardial infarction.

**Suplementary Figure 1:** Heatmap presenting averaged time-in-range (A), time-above range (B) and time-in-tight range (C) within daily hours and weekdays in patients without and with diabetes mellitus. Red color represent higher, while blue color represent lower % of time in and above range. TAR: Time above range; TIR: Time in range; TTR: Time in tight range.

**
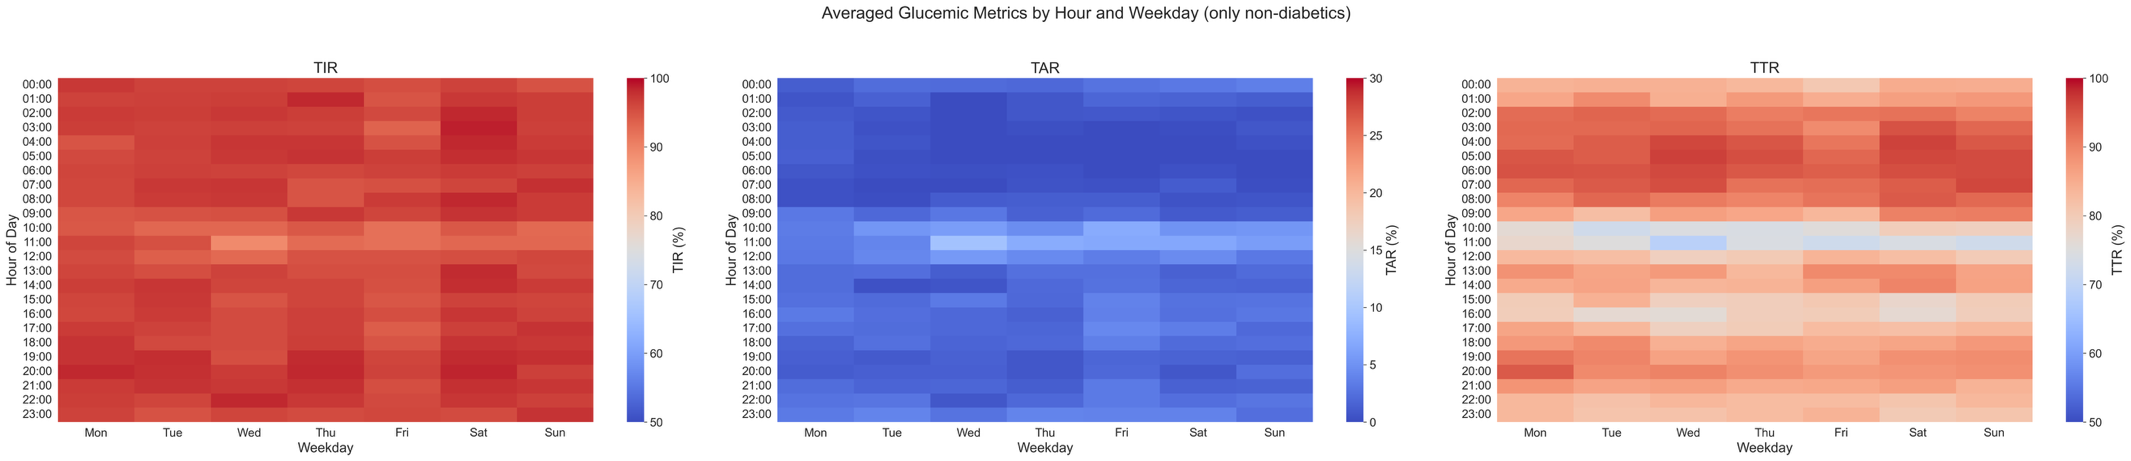
**

**
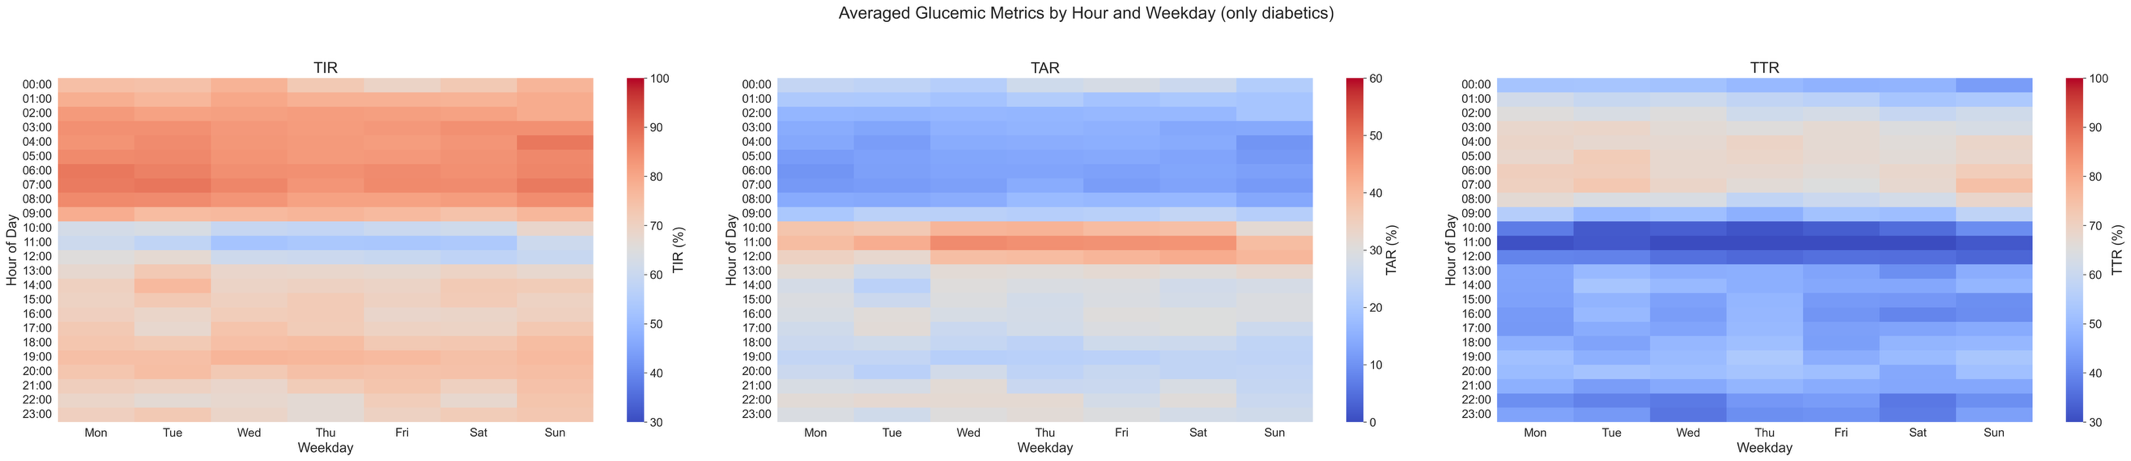
**

**Suplementary Figure 2:** Multivariable model for clinical and glucometric predictors of time-in-tight-range worsening trajectories between baseline and 4-months follow-up. Worseners were defined as a ΔTTR ≤ −5%. CI: Confidence Interval; CKD: Chronic Kidney Disease; CONGA-24: Continuous Overall Net Glycemic Action-24 hour; COPD: Chronic Obstructive Pulmonary Disease; CV: Coefficient of Variation; MAGE: Mean Amplitude of Glucose Excursions; OR: Odds Ratio.


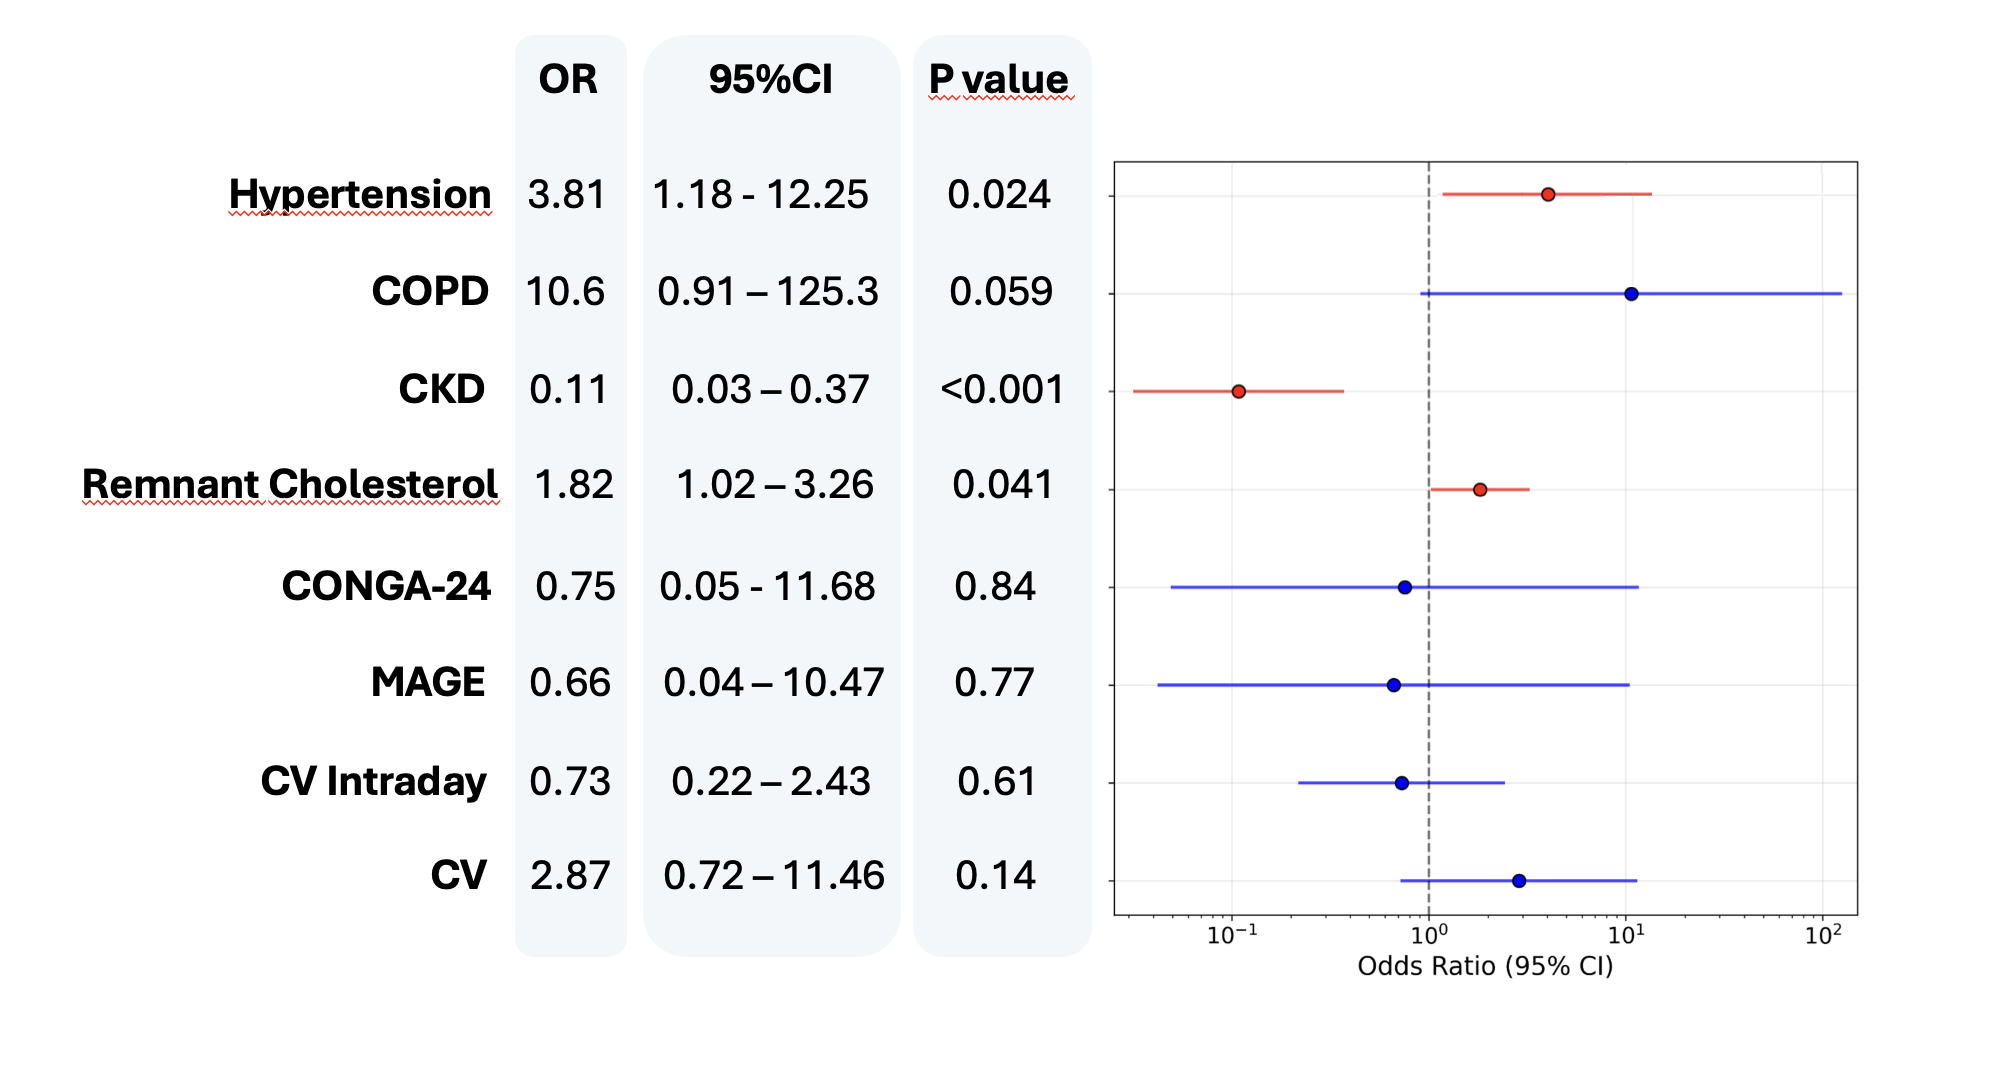

Supplement: Supplementary file 1 [file 70e086e6ead744ff9b3eeefe.docx]
